## IMPACTS OF PERCEIVED SOCIAL SUPPORT ON ALCOHOL AND CANNABIS USE

### **Differential Impacts of Perceived Social Support on Alcohol and Cannabis Use in Young Adults: Lessons from the COVID-19 Pandemic**

Michelle J. Blumberg<sup>1,2\*</sup> & Lindsay A. Lo<sup>1,3\*</sup>, Geoffrey W. Harrison<sup>1</sup>, Alison Dodwell<sup>1</sup>,  
Samantha H. Irwin<sup>1</sup>, Mary C. Olmstead<sup>1,4</sup>

\*Shared co-first authorship

<sup>1</sup>Department of Psychology, Queen's University, 52 Arch St, Kingston, Ontario, Canada, K7L 3N6

<sup>2</sup>Department of Psychology, York University, 4700 Keele St, North York, ON M3J 1P3

<sup>3</sup>Department of Public Health Sciences, University of Toronto, 155 College St, Toronto, Ontario, Canada, M5T 3M7

<sup>4</sup>Centre for Neuroscience Studies, Queen's University, 18 Stuart Street, Kingston, Ontario, Canada, K7L 3N6

*Corresponding Author:*

Lindsay A. Lo

[Lindsay.Lo@mail.utoronto.ca](mailto:Lindsay.Lo@mail.utoronto.ca)

## IMPACTS OF PERCEIVED SOCIAL SUPPORT ON ALCOHOL AND CANNABIS USE

### **Abstract**

Coronavirus (COVID-19) lockdowns provided a unique opportunity to examine how changes in the social environment impact mental health and wellbeing. We addressed this issue by assessing how perceived social support across COVID-19 restrictions alters alcohol and cannabis use in emerging adults, a population vulnerable to adverse outcomes of substance use. Four hundred sixty-three young adults in Canada and the United States completed online questionnaires for three retrospective time points: Pre-Covid, Lockdown and Eased Restrictions. Sociodemographic factors, perceived social support, and substance use were assessed. Overall, alcohol use decreased while cannabis use increased during Lockdown. Interestingly, social support negatively predicted alcohol use and positively predicted cannabis use during Lockdown. These findings suggest a difference in motives underlying alcohol and cannabis use in emerging adults. Importantly, these changes were not sustained when restrictions eased, suggesting that emerging adults exhibit resiliency to the impacts of COVID-19 restrictions on substance use.

*Keywords:* Alcohol, cannabis, social support, COVID-19, young adults

## IMPACTS OF PERCEIVED SOCIAL SUPPORT ON ALCOHOL AND CANNABIS USE

### 1 **Differential Impacts of Perceived Social Support on Alcohol and Cannabis Use in Young**

### 2 **Adults: Lessons from the COVID-19 Pandemic**

#### 3 **Introduction**

4 The coronavirus (COVID-19) was declared a pandemic by the World Health  
5 Organization in March 2020 (World Health Organization, 2020). Following this, efforts to limit  
6 spread of the virus included widespread stay at home orders, and the closure of non-essential  
7 services, schools, and workplaces. This led to immense changes in daily life that were  
8 particularly impactful on young adults who rely on social interactions and social support for  
9 wellbeing (Asher & Weeks, 2013; Sandstrom & Dunn, 2014; Dissing et al., 2019; Richards et  
10 al., 2019; Scardera et al., 2020). Social support is broadly defined as the assistance and  
11 protection given to others (Shumaker & Brownell 1984, Wortman & Dunkel-Schetterm, 1987),  
12 and consists of four defining attributes: emotional, instrumental, informational, and appraisal  
13 support (Barrera, 1986). Constituents to social support include one's social network, which is the  
14 interactive field of persons that provide helpfulness and protection (Berkman, 1984, Gottlieb,  
15 1983), and social embeddedness, which is the connectedness people have to others within their  
16 social network (Barrera 1986, Langford et al 1997). Concerns over the impact of COVID-19 on  
17 mental health (Abbott, 2021; Galea et al., 2020; Singh et al., 2020), specifically substance use  
18 (Czeisler et al., 2020; Ornell et al., 2020), have simultaneously increased. Consequently,  
19 government mandated lockdowns provided a unique opportunity to assess the impact of social  
20 support on substance use. The goal of the current study was to integrate these two areas by  
21 investigating the impact of social support on alcohol and cannabis use among young adults in  
22 Canada and the United States throughout the COVID-19 pandemic.

## IMPACTS OF PERCEIVED SOCIAL SUPPORT ON ALCOHOL AND CANNABIS USE

23 Alcohol and cannabis are two of the most widely used psychoactive substances (Peacock  
24 et al., 2017; Vincenzi et al., 2017), and are both associated with acute and chronic negative  
25 effects. Generally, studies have found increased alcohol and cannabis use during COVID-19 in  
26 adult samples (e.g., Taylor et al., 2021; Barbosa et al., Dumas et al., 2020; 2020; Jacob et al.,  
27 2020; Grossman et al., 2020; Sharma et al., 2020; Wardell et al., 2020), but these patterns may  
28 differ in young adult samples. Young adulthood is generally accepted in the psychological  
29 literature to refer to the crucial developmental period following adolescence (emphasizing  
30 identity formation) that most individuals reach between the ages of 19 and 39 years (Erikson,  
31 1965). Critically, the literature investigating alcohol and cannabis use patterns in young adults  
32 during the COVID-19 pandemic is much slimmer, and these studies have obtained mixed results.  
33 For example, both increases (Romm et al., 2021; Sharma et al., 2020; Lechner et al., 2020) and  
34 decreases in alcohol consumption have been reported in young adults (Bollen et al., 2021; White  
35 et al., 2020). Of the available literature on changes in cannabis use, no change and increases in  
36 use have both been reported (Romm et al., 2021; Graupensperger et al., 2021; Bonar et al., 2021;  
37 Papp & Kouros, 2021). Furthermore, there is a lack of research directly comparing patterns of  
38 alcohol and cannabis use in this population across the pandemic. These contradictory findings  
39 may reflect differences in how substance use was assessed and alterations in social restrictions  
40 associated with different phases of the pandemic. Identifying the factors that impact patterns of  
41 alcohol and cannabis use in young adults during COVID-19 is important as this group is  
42 particularly vulnerable to developing substance use disorder and other mental health conditions,  
43 including both internalizing (characterized by anxiety, depression, and somatic symptoms) and  
44 externalizing (characterized by impulsive and disruptive symptoms) disorders (American

## IMPACTS OF PERCEIVED SOCIAL SUPPORT ON ALCOHOL AND CANNABIS USE

45 Psychiatric Association, 2013; Brewer et al., 2017; Gray & Squeglia, 2017; Hamidullah et al.,  
46 2020).

47 Contradictory findings regarding substance use during COVID-19 suggest that individual  
48 factors impacted alcohol and cannabis use in young adults during this period. Given the dramatic  
49 changes in social interactions during lockdowns, differences in social support may explain the  
50 conflicting evidence obtained from previous studies. Evidence supports that social support  
51 encourages positive health behaviors and is also a stress-buffering mechanism (Emmons et al.,  
52 2007, Wills et al., 2004, Wills & Ainette, 2012). As such, social support is well supported in the  
53 literature to be associated with substance use (Wills et al., 2004, Wills & Ainette, 2012). More  
54 specifically, social integration and social support are linked to decreased prevalence of smoking  
55 and heavy drinking (Brennan & Moss, 1990; Romano, Bloom, & Syme, 1991). Social support  
56 may also mitigate the risk of problem drinking in young adults through reduced psychological  
57 distress (Segrin et al., 2016). Lower familial support is associated with increased substance use  
58 among young people (Piko et al., 2000; Beitchman et al., 2005; Arias-De la Torre, 2019).  
59 Therefore, individual differences in social support may explain divergent findings in substance  
60 use patterns during COVID-19.

61 Lower social support and related factors have been associated with increased substance  
62 use during COVID-19 in adults (Wardell et al., 2020; Vanderbruggen et al., 2020; Clair et al.,  
63 2020; Horigian et al., 2020), but findings in younger adult samples are less clear. Some studies  
64 have replicated a negative relationship between social support-related factors and drinking  
65 (Lechner et al., 2020; Sharma et al., 2020; Bollen et al., 2021). Although few studies have  
66 examined the relationship between social support and cannabis use in young adults during  
67 COVID-19, two studies suggested factors related to social support (e.g., loneliness, isolation)

## IMPACTS OF PERCEIVED SOCIAL SUPPORT ON ALCOHOL AND CANNABIS USE

68 may also be associated with increased cannabis use (Bonar et al., 2021; Bartel et al., 2020).  
69 There is a growing interest in investigating the impact of social support (particularly loneliness  
70 and living alone) on substance use among young adults (e.g., Horigian et al., 2021; Sylvestre,  
71 2022). However, further research is needed to understand the direct impact of perceived social  
72 support from family, friends, and significant others on alcohol and cannabis use throughout  
73 different periods of COVID-19 restrictions.

74 Accordingly, the goal of the current study was to investigate changes in alcohol and  
75 cannabis use in young adults across three phases of the pandemic. Timepoint 1 refers to the  
76 period preceding the pandemic onset. Timepoint 2 refers to the first wave of COVID-19 (i.e.,  
77 tight restrictions that limited in-person interactions). Timepoint 3 refers to the period after the  
78 first wave (i.e., ease of restrictions). Additionally, we sought to investigate the ways in which  
79 perceived social support impacted substance use among young adults throughout these phases.  
80 First, we hypothesized that alcohol and cannabis use would increase during the first wave of  
81 COVID-19 when lockdown orders were in place. Second, we hypothesized that perceived social  
82 support would modulate changes in substance use throughout COVID-19. Specifically, we  
83 predicted that only those with low levels of social support would experience an increase in  
84 substance use during the first wave.

85 Concerns of the impact of the COVID-19 pandemic on health outcomes, specifically  
86 mental health, have persisted. Given that young adulthood is a vulnerable period for developing  
87 mental health conditions, including substance dependence, findings from this study provide  
88 valuable information on how social restrictions impact substance misuse and may help guide  
89 preventative or intervention measures in the future.

## 90 **Methods**

## IMPACTS OF PERCEIVED SOCIAL SUPPORT ON ALCOHOL AND CANNABIS USE

### 91 **Sample and Design**

92           This study used a longitudinal retrospective survey design. Five hundred fifty-two adults  
93 (19-30 years of age) were recruited from Canada and the United States via social media (e.g.,  
94 Facebook, emails listservs, Instagram, Twitter) and the Queen's University participant pool.  
95 Authors (MJB, LAL, AD, and SHI) distributed the survey link and study advertisement via these  
96 platforms. To screen for eligibility, participants were first asked to indicate their country of  
97 residence, their age, and whether they had consumed alcohol and/or cannabis in 2020. Those  
98 who were not living in Canada or the United States, were not between 19 and 30 years of age,  
99 and who did not consume alcohol and/or cannabis at any point in 2020 were excluded from the  
100 study. The same participants completed a survey (approximately 15 minutes) that gathered  
101 information on sociodemographic characteristics, perceived social support, and substance use at  
102 three distinct retrospective time points. Data were collected between August and November 2020  
103 using the following time points: Timepoint 1 = January to early March 2020 (Pre-COVID);  
104 Timepoint 2 = mid-March to the end of May 2020 (Lockdown); and Timepoint 3 = June to July  
105 2020 (Eased Restrictions). The questionnaire was designed and administered through Qualtrics  
106 Survey Software (Qualtrics, Provo, UT). Respondents were either entered in a draw to win one  
107 of ten Amazon or Starbucks gift cards valued at \$25 each or received course credit for their  
108 participation. Incomplete surveys were excluded. For this analysis, the small number of  
109 individuals reporting unemployment before COVID-19 (n = 11) were excluded due to higher  
110 reported levels of substance use compared to students and employed young adults, as meaningful  
111 conclusions cannot be made due to the small group size. The final sample was 463.

### 112 **Measures**

## IMPACTS OF PERCEIVED SOCIAL SUPPORT ON ALCOHOL AND CANNABIS USE

113 Sociodemographic variables included gender, age, completed level of education, and  
114 employment status at the time of survey completion.

### 115 *Perceived social support*

116 Social Support was measured at each time point using the Multidimensional Scale of  
117 Perceived Social Support (MSPSS, Zimet et al., 1988). The MSPSS is a validated scale that  
118 measures subjective feelings of social support from family, friends, and significant others. The  
119 MSPSS includes 13 questions rated on a 7-point Likert scale (1 = Very strongly disagree to 7 =  
120 Very strongly agree). Some example items are “*I could talk about my problems with my family*”  
121 *and “I could count on my friends when things went wrong”*. Items were summed to obtain a  
122 composite Social Support score for each respondent.

### 123 *Alcohol and Cannabis Use*

124 Alcohol and cannabis use were measured using a variation of the Timeline Followback  
125 Alcohol and Marijuana Use Calendar, a well-validated calendar assisted alcohol and cannabis  
126 use measure, for up to 12 months prior (TLFB, Sobell & Sobell, 1992; Sobell et al., 2001).  
127 Specifically, respondents were asked to provide retrospective estimates of the number of days  
128 alcohol was consumed and the number of alcoholic drinks consumed in a typical week for each  
129 time point. Respondents were then asked to report the number of days and the number of times  
130 cannabis was ingested during a typical week within each time point. More specifically,  
131 respondents were told to consider one ingestion of cannabis to be one occasion in which they  
132 consumed Tetrahydrocannabinol (THC)-containing cannabis products, such as one joint, pipe or  
133 an edible. Number of days was used as our measure of frequency of alcohol and cannabis  
134 consumption. Number of drinks (alcohol) and ingestions (cannabis) was used as indicators of the  
135 quantity of alcohol and cannabis consumed.



## IMPACTS OF PERCEIVED SOCIAL SUPPORT ON ALCOHOL AND CANNABIS USE

### 136 *Statistical Analysis*

137 All analyses were conducted on the four dependent measures of substance use: frequency  
138 of alcohol consumption (number of days/week), quantity of alcohol consumed (number of  
139 alcoholic drinks/week), frequency of cannabis consumption (number of days/week), and quantity  
140 of cannabis consumed (number of ingestions/week). Initial one-way repeated measures Analysis  
141 of Variances (ANOVAs) were run to determine the impact of time points on Social Support and  
142 levels of substance use. Following this, four linear mixed-effects models were used to predict  
143 each substance use measure from Social Support at each of three COVID time points coded as  
144 fixed effects, and participants coded as random effects (Kristensen and Hansen, 2004; Magezi,  
145 2015). Linear mixed-effects models are a more appropriate analytic tool for repeated measure  
146 designs than repeated measures ANOVAs as they accommodate missing data, are more likely to  
147 meet their underlying assumptions, provide better interpretability, model variance at the  
148 participant level, and provide more accurate parameter estimates (Kristensen and Hansen, 2004).  
149 The three time points of COVID were dummy coded with Lockdown as the reference, creating  
150 two dummy coded variables. Dummy coded variable one represented a comparison between Pre-  
151 COVID and Lockdown and dummy coded variable two represented a comparison between Eased  
152 Restrictions and Lockdown. Social Support was grand mean centered. The full model included  
153 both dummy coded COVID time points, grand mean centered Social Support, and their  
154 interactions with gender and level of education included as covariates. For the purposes of  
155 following up significant interactions, we examined Social Support at mean levels (moderate  
156 Social Support) and at 1 SD above (higher Social Support) and 1 SD below (lower Social  
157 Support) mean levels. Statistical analyses were the lmer package (Bates et al., 2014) carried out  
158 using R (version 3.6.2) and RStudio (version 1.2.5033).

## IMPACTS OF PERCEIVED SOCIAL SUPPORT ON ALCOHOL AND CANNABIS USE

### 159 **Results**

### 160 **Sample Characteristics**

161 Table 1 presents sample characteristics of participations. Scores on the MSPSS ranged  
162 from 12 to 84 (i.e., low to high Social Support).

163 **Table 1.** Sample Characteristics

| <b>Variables</b>                            | <b><i>n</i></b> | <b>%</b> | <b>Mean (SD)</b> |
|---------------------------------------------|-----------------|----------|------------------|
| <b>Age</b>                                  |                 |          | 22.49 (2.86)     |
| <b>Gender</b>                               |                 |          |                  |
| Male                                        | 89              | 18.1     |                  |
| Female                                      | 369             | 79.7     |                  |
| Transgender Female                          | 0               | 0        |                  |
| Transgender Male                            | 0               | 0        |                  |
| Gender Variant/ Non-conforming              | 4               | 0.8      |                  |
| Other                                       | 1               | .2       |                  |
| <b>Country of Residence</b>                 |                 |          |                  |
| Canada                                      | 447             | 96.5     |                  |
| United States                               | 16              | 3.5      |                  |
| <b>Pre-Covid Employment status</b>          |                 |          |                  |
| Student                                     | 310             | 62.9     |                  |
| Working                                     | 153             | 31       |                  |
| <b>During COVID Employment status</b>       |                 |          |                  |
| Student                                     | 179             | 36.3     |                  |
| Working                                     | 198             | 40.2     |                  |
| Unemployed                                  | 86              | 17.4     |                  |
| <b>Highest Completed Level of Education</b> |                 |          |                  |

## IMPACTS OF PERCEIVED SOCIAL SUPPORT ON ALCOHOL AND CANNABIS USE

|                                    |     |      |
|------------------------------------|-----|------|
| No Degree                          | 1   | .2   |
| Highschool                         | 174 | 35.3 |
| Undergraduate/ college             | 235 | 47.7 |
| Post-graduate (masters, doctoral)  | 38  | 7.7  |
| Professional (medicine, law, etc.) | 10  | 2    |
| Other                              | 5   | 1    |

---

164

### 165 Overall Trends in Substance Use

166

167 Individuals' level of Social Support decreased from Pre-COVID ( $M = 67.31$ ,  $SD = 13.37$ )

168 to Lockdown ( $M = 64.17$ ,  $SD = 15.24$ ), then increased again during Eased Restrictions ( $M =$

169  $65.94$ ,  $SD = 15.36$ ),  $F(2, 924) = 25.70$ ,  $p < .001$ ,  $\eta_p^2 = .053$ .

170 The number of days Alcohol was consumed decreased from Pre-COVID ( $M = 2.01$ ,  $SD =$

171  $1.65$ ) to Lockdown ( $M = 1.34$ ,  $SD = 2.49$ ), then increased again during Eased Restrictions ( $M =$

172  $2.33$ ,  $SD = 2.36$ ),  $F(2, 924) = 38.31$ ,  $p < .001$ ,  $\eta_p^2 = .077$  (see Figure 2a). The quantity of

173 Alcohol consumed decreased from Pre-COVID ( $M = 7.25$ ,  $SD = 8.01$ ) to Lockdown ( $M = 3.37$ ,

174  $SD = 9.29$ ), then increased again during Eased Restrictions ( $M = 5.75$ ,  $SD = 8.17$ ),  $F(2, 924) =$

175  $39.43$ ,  $p < .001$ ,  $\eta_p^2 = .079$ .

176 The number of days Cannabis was consumed increased from Pre-COVID ( $M = 1.64$ ,  $SD$

177  $= 2.75$ ), to Lockdown ( $M = 2.36$ ,  $SD = 2.10$ ), then decreased during Eased Restrictions ( $M =$

178  $1.66$ ,  $SD = 2.75$ ),  $F(2, 924) = 23.02$ ,  $p < .001$ ,  $\eta_p^2 = .047$ . The quantity of Cannabis consumed

179 increased from Pre-COVID ( $M = 3.96$ ,  $SD = 10.11$ ), to Lockdown ( $M = 6.56$ ,  $SD = 8.80$ ), then

180 decreased during Eased Restrictions ( $M = 4.19$ ,  $SD = 10.39$ ),  $F(2, 924) = 19.35$ ,  $p < .001$ ,  $\eta_p^2 =$

181  $.040$ .

## IMPACTS OF PERCEIVED SOCIAL SUPPORT ON ALCOHOL AND CANNABIS USE

### 182 **Relationship between Substance Use and Social Support**

183

#### 184 *Alcohol*

185

186 **Frequency of Alcohol Consumption.** In order to determine the impact of Social Support

187 during three COVID time points on alcohol consumption behavior, we ran a linear mixed-effects

188 model predicting frequency of Alcohol consumption from the interaction between time point and

189 Social Support. The model revealed significant interactions between both dummy coded COVID

190 time point variables and Social Support,  $bs > 0.03$ ,  $ts > 3.20$ ,  $ps \leq .001$  (see Figure 1).

191 To follow up these interactions we first examined the relationship between Social

192 Support and frequency of Alcohol use at each time point. Pre-COVID, frequency of Alcohol use

193 was not related to Social Support,  $b(1357) = 0.013$ ,  $CI = [-0.002, 0.027]$ . During Lockdown,

194 Social Support negatively predicted frequency of Alcohol use,  $b(1347) = -0.014$ ,  $95\% CI = [-$

195  $0.027, -0.002]$ . During Eased Restrictions, Social Support positively predicted frequency of

196 Alcohol use,  $b(1346) = 0.014$ ,  $95\% CI = [0.001, 0.026]$ .

197 Second, we examined differences in the frequency of Alcohol consumption across time

198 points at each level of Social Support. For individuals with low Social Support, the frequency of

199 Alcohol consumption was consistent between Pre-COVID and both Lockdown and Eased

200 Restrictions, but significantly increased from Lockdown to Eased Restrictions,  $t(928) = -3.67$ ,  $p$

201  $= 0.001$ . For individuals with moderate to high levels of Social Support there was a significant

202 decrease in the frequency of Alcohol use from Pre-COVID to Lockdown, all  $ts > 5.80$ , all  $ps <$

203  $.001$ , and a significant increase in the frequency of Alcohol use from Lockdown to Eased

204 Restrictions, all  $ts > 8.49$ , all  $ps < .001$ . However, only those with moderate Social Support

205 reported significantly higher frequency of Alcohol use during Eased Restriction compared to

206 Pre-COVID,  $t(916) = 2.73$ , all  $p = .018$ .

## IMPACTS OF PERCEIVED SOCIAL SUPPORT ON ALCOHOL AND CANNABIS USE

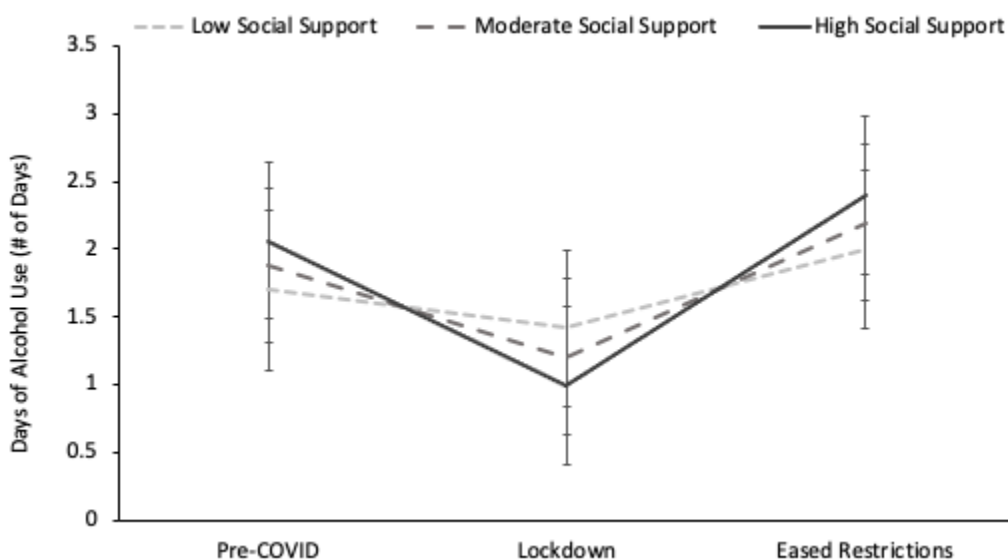

207

208 **Figure 1.** Changing relationship between social support and frequency of alcohol consumption

209 throughout COVID-19 time points. Error bars show standard error of the means.

210

211 **Quantity of Alcohol Consumption.** Similar to the frequency of Alcohol consumption,

212 when predicting the quantity of Alcohol consumption, both time point variables significantly

213 interacted with Social Support,  $bs > 0.067$ ,  $ts > 2.19$ ,  $ps < .029$  (see Figure 2).

214 To follow up these interactions we first examined the relationship between Social

215 Support and quantity of Alcohol use at each time point. Surprisingly, unlike for the frequency of

216 Alcohol use, Social Support was not significantly related to the quantity of Alcohol consumed at

217 any time point.

218 Second, we examined differences in the frequency of Alcohol consumption across time

219 points at each level of Social Support. For all levels of Social Support, the quantity of Alcohol

220 use decreased from Pre-COVID to Lockdown, all  $ts > 4.31$ , all  $ps < .001$ . For those with

221 moderate and high Social Support, the quantity of Alcohol use increased from Lockdown to

222 Eased Restrictions, all  $ts > 5.28$ , all  $ps < .001$ , whereas those with low Social Support saw a

## IMPACTS OF PERCEIVED SOCIAL SUPPORT ON ALCOHOL AND CANNABIS USE

223 marginal increase,  $t(928) = 2.29, p = .06$ . Compared to Pre-COVID levels, individuals across all  
224 levels of Social Support saw at least a marginal drop in the quantity of Alcohol use during Eased  
225 Restrictions, all  $t_s > 2.16$ , all  $p_s < .079$ .

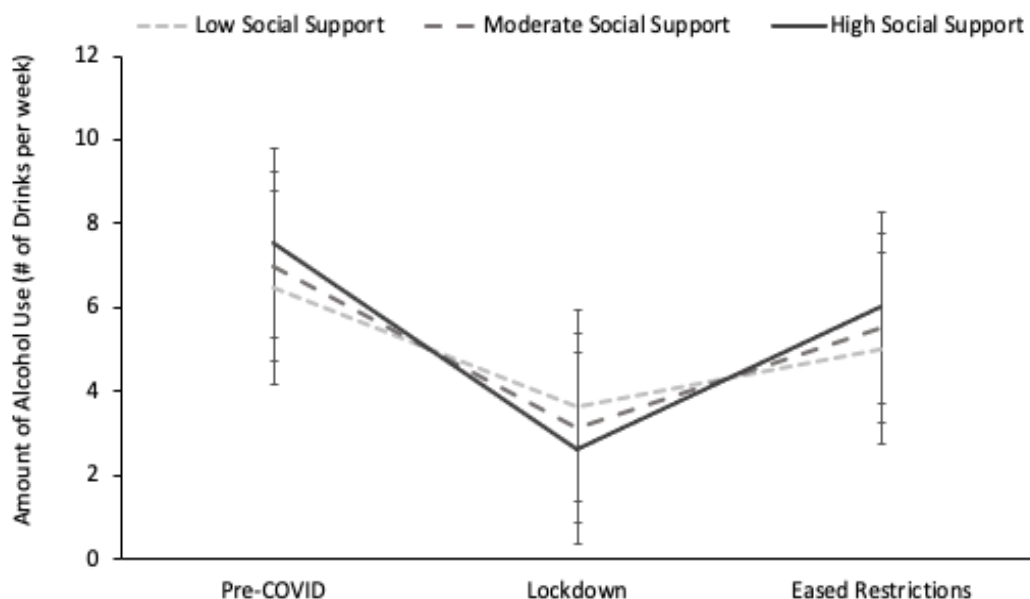

226  
227 **Figure 2.** Changing relationship between social support and quantity of alcohol consumption  
228 throughout COVID-19 time points. Error bars show standard error of the means.

### 229 230 *Cannabis*

231 **Frequency of Cannabis Consumption.** In order to determine the impact of Social  
232 Support during three COVID time points on cannabis consumption behavior, we ran a linear  
233 mixed-effects model predicting the frequency of Cannabis consumption from the interaction  
234 between COVID time points and Social Support. Like with the frequency of Alcohol  
235 consumption, the model revealed significant interactions between both dummy coded time point  
236 variables and Social Support,  $b_s > -0.04$ ,  $t_s > -5.10$ ,  $p_s < .001$  (see Figure 3). However, the nature  
237

## IMPACTS OF PERCEIVED SOCIAL SUPPORT ON ALCOHOL AND CANNABIS USE

238 of the relationship between Social Support and Cannabis use during each COVID time point was  
239 very different.

240 To follow up these interactions we first examined the relationship between Social  
241 Support and frequency of Cannabis use at each time point. Pre-COVID and during Eased  
242 Restrictions, Social Support negatively predicted the frequency of Cannabis consumption, all  $b$ s  
243  $> -0.023$ ,  $CI = [-0.037, -0.010]$ . In contrast, during Lockdown Social Support had the opposite  
244 effect, positively predicting the frequency of Cannabis use,  $b(1353) = 0.017$ , 95%  $CI = [0.003,$   
245  $0.031]$ .

246 Second, we examined differences in the frequency of Cannabis consumption across time  
247 points at each level of Social Support. For individuals with low Social Support, Cannabis use  
248 remained constant across all three COVID time points, all  $t$ s  $< 0.72$ , all  $p$ s  $> .75$ . For those with  
249 moderate and high Social Support, frequency of use increased from Pre-COVID to Lockdown,  
250 all  $t$ s  $> 5.85$ , all  $p$ s  $< .001$ , and then decreased from Lockdown to Eased Restrictions, all  $t$ s  $>$   
251  $5.94$ , all  $p$ s  $< .001$ . The decrease during Eased Restrictions was a return to Pre-COVID levels, all  
252  $t$ s  $< 0.53$ , all  $p$ s  $> .86$ .

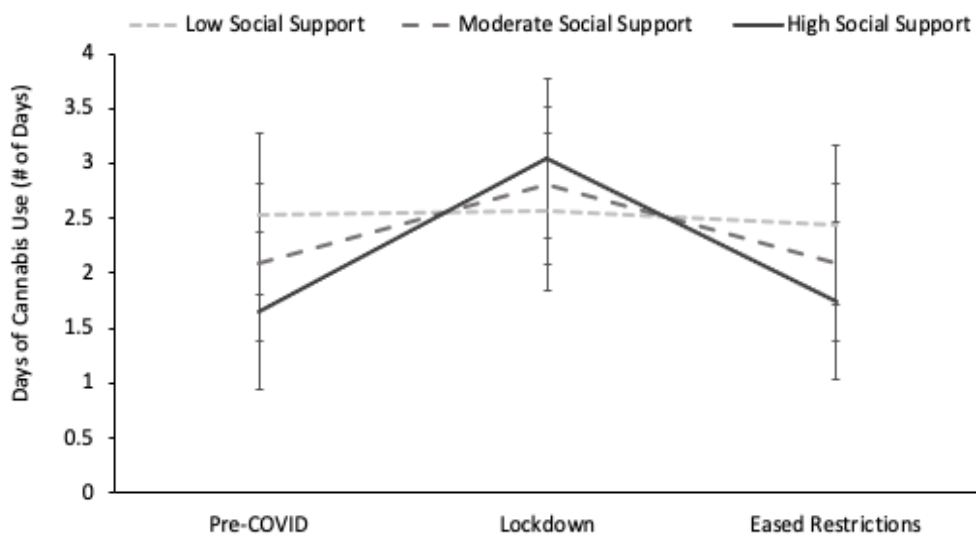

253

## IMPACTS OF PERCEIVED SOCIAL SUPPORT ON ALCOHOL AND CANNABIS USE

254 **Figure 3.** Changing relationship between social support and frequency of cannabis consumption  
255 throughout COVID-19 time points. Error bars show standard error of the means.

256

257 **Quantity of Cannabis Consumption.** Similar to the frequency of Cannabis  
258 consumption, when predicting the quantity of Cannabis consumption, both time point variables  
259 interacted with Social Support,  $bs > -0.116$ ,  $ts > 3.80$ ,  $ps < .001$  (see Figure 4).

260 To follow up these interactions we first examined the relationship between Social  
261 Support and quantity of Cannabis use at each time point. Similar to the frequency of Cannabis  
262 consumption, Pre-COVID and during Eased Restrictions Social Support negatively predicted the  
263 quantity of Cannabis use, all  $bs > -0.103$ , 95% CI = [-0.156, -0.050]. However, in contrast to the  
264 frequency of Cannabis consumption, during Lockdown Social Support did not predict the  
265 quantity of Cannabis use,  $b = 0.013$ , 95% CI = [-0.041, 0.067].

266 Second, we examined differences in the frequency of Cannabis consumption across time  
267 points at each level of Social Support. The quantity of Cannabis use remained consistent between  
268 Pre-COVID, Lockdown, and Eased Restrictions for individuals with low Social Support, all  $ts <$   
269  $1.03$ , all  $ps > .56$ . Conversely, individuals with moderate or high Social Support increased their  
270 quantity of Cannabis use from Pre-COVID to Lockdown, all  $ts > 5.15$ , all  $ps < .001$ , and then  
271 decreased during Eased Restrictions, all  $ts > 5.10$ , all  $ps < .001$ . As with the frequency of  
272 Cannabis use this decrease was to the same levels as Pre-COVID, all  $ts < 0.90$ , all  $ps > .64$ .



## IMPACTS OF PERCEIVED SOCIAL SUPPORT ON ALCOHOL AND CANNABIS USE

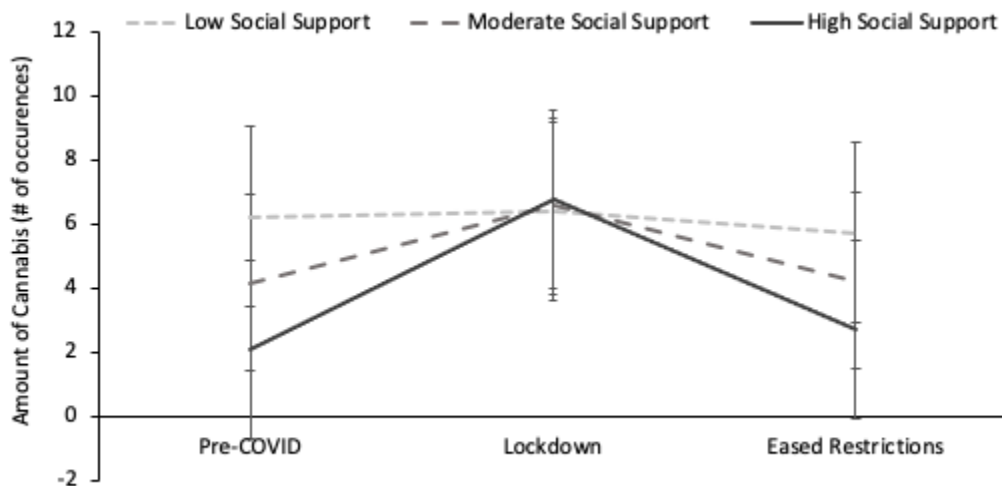

273

274 **Figure 4.** Changing relationship between social support and quantity of cannabis consumption  
275 throughout COVID-19 time points. Error bars show standard error of the means.

276

### 277 Discussion

278 COVID-19 lockdowns provided a unique opportunity to assess the impact of Social  
279 Support on alcohol and cannabis use in emerging adults. Compared to Pre-COVID, alcohol use  
280 decreased during Lockdown, whereas cannabis use increased. These changes were modulated by  
281 perceived social support with Social Support negatively predicting alcohol use and positively  
282 predicting cannabis use during Lockdown. These patterns were not maintained during Eased  
283 Restrictions. Specifically, overall alcohol use increased, and cannabis use returned to Pre-  
284 COVID levels. The influence of social support and changes to social environments suggest that  
285 distinct motives underlie alcohol and cannabis use in emerging adults.

286 The overall decrease in alcohol use during Lockdown in our study likely occurred  
287 because emerging adulthood is associated with drinking in social contexts (Schwartz & Petrova,  
288 2019; Gruzca, Norberg, & Bierut, 2009). When the pandemic struck, many students moved

## IMPACTS OF PERCEIVED SOCIAL SUPPORT ON ALCOHOL AND CANNABIS USE

289 home, which likely contributed to the decrease in alcohol consumption. Reduced opportunities to  
290 engage in social drinking, therefore, may explain the overall decrease in alcohol use in our  
291 sample. At the same time, the absence of a university environment, itself, was not associated  
292 with decreased substance use as cannabis use increased during Lockdown. Individuals may have  
293 substituted alcohol with cannabis during this period, reflecting different motives for using the  
294 two substances. More specifically, drinking is socially motivated (e.g., Grant et al., 2007; O'Hara  
295 et al., 2015; Van Damme et al., 2013; Vaughan et al., 2009) and there were few opportunities for  
296 social interactions during Lockdown. In contrast, cannabis use may be motivated by a desire to  
297 reduce stress and anxiety (Bottorff et al., 2009; Hyman & Sinha, 2009; Glodosky & Cuttler,  
298 2020), both of which were elevated during Lockdown. Furthermore, there is evidence that  
299 enhancement motives are notably associated with cannabis use in emerging adults (Gette et al.,  
300 2021). Taken together, young adults may have increased their cannabis use with the goal of  
301 reducing pandemic-related stress and feelings of boredom.

302         Reductions in alcohol use during Lockdown were highest among individuals with higher  
303 social support, suggesting that their alcohol use may be more susceptible to the changes in social  
304 contexts that occurred during Lockdown. Moreover, alcohol consumption in young adults is  
305 heavily influenced by the drinking behaviors of close friends and social networks (Astudillo et  
306 al., 2013; Jamison & Myers, 2008). Consequently, individuals with higher social support may be  
307 more prone to these social influences because they presumably have higher quality and quantity  
308 of friendships. Although all individuals decreased their quantity of alcohol use during  
309 Lockdown, the decrease was larger for those with higher social support, suggesting increased  
310 sensitivity to the influence of social environments on drinking. Social support also had less  
311 impact on changes in cannabis use among individuals with lower social support: this group used

## IMPACTS OF PERCEIVED SOCIAL SUPPORT ON ALCOHOL AND CANNABIS USE

312 greater amounts of cannabis Pre-COVID but did not increase their use during Lockdown.  
313 Baseline stress levels may have been higher in these individuals, making them less sensitive to  
314 the additional stress brought on by COVID-19 lockdowns and social isolation. Interestingly,  
315 although social support has a protective role against stress and substance use (Li et al., 2021;  
316 Ozbay et al., 2007; Rapier et al., 2019; Stone et al., 2012), higher social support did not mitigate  
317 the impact of COVID-induced stress on cannabis use. This suggests that the protective role of  
318 social support may only be applicable when individuals are not socially isolated. In other words,  
319 higher social support individuals may have used cannabis to cope with stress and boredom  
320 during social isolation. Taken together, our findings support pre-existing literature that different  
321 motives and levels of social support underlie alcohol and cannabis use.

322         With the emergence of new COVID-19 variants, the world will likely continue to cycle  
323 between various extents of social restrictions and lockdowns. Critically, there has been growing  
324 concern over the lasting impacts of the pandemic on substance use and mental health (Abbott,  
325 2021; Czeisler et al., 2020; Galea et al., 2020; Singh et al., 2020). Our work adds to these  
326 investigations, while showing that changes to alcohol and cannabis use during Lockdown were  
327 not sustained when restrictions eased. The rebound in alcohol use during Eased Restrictions  
328 provides further evidence that drinking in young adults is socially motivated. Similarly, cannabis  
329 use, which increased during Lockdown, returned to Pre-COVID levels during Eased Restrictions,  
330 suggesting that individuals with high social support were using cannabis to cope with stress and  
331 boredom during social isolation. Regardless of whether changes to substance use during  
332 Lockdown were favorable (e.g., decreased alcohol use) or unfavorable (e.g., increased cannabis  
333 use), young adults may be resilient to the impacts of COVID-19 lockdowns on substance use.

## IMPACTS OF PERCEIVED SOCIAL SUPPORT ON ALCOHOL AND CANNABIS USE

334 As with most self-report and retrospective studies, participant calculations of substance  
335 use may have been less precise than data collected in real time. The issue was mitigated, at least  
336 partially, using the validated TLFB. This measure is widely used to assess retrospective  
337 substance use, with several studies showing its validity (Sobell et al., 2001; Martin-Willet et al.,  
338 2020; Levy et al., 2004). Measuring cannabis use through ingestions may also have limited  
339 precision as the quantity consumed through one ingestion can vary based on the individual and  
340 method of consumption. Despite these limitations, we adopted this measure in our study so that  
341 our findings would be consistent with previous work using a validated method of quantifying  
342 cannabis use (i.e., TLFB). We also acknowledge the difficulty in relating changes in substance  
343 use to social restrictions when the timing of these regulations varied across regions in North  
344 America. Although there were widespread lockdowns in March 2020, this could have impacted  
345 individuals' substance use throughout the three time points. Moreover, although we recruited  
346 participants from both Canada and the United States, the U.S. sample was small (N = 16).  
347 Consequently, we cannot make any definitive conclusions regarding substance use patterns in  
348 this group. Nevertheless, the substance use patterns in this group follow the same trends as the  
349 rest of the sample. Thus, we decided to include this group as part of the overall sample. The  
350 same issues with measuring substance use retrospectively apply to measuring perceived social  
351 support retrospectively. However, the MSPSS has good test-retest reliability over several months  
352 (Zimet et al., 1988). Additionally, as our sample was primarily composed of university students,  
353 findings may not generalize to other emerging adults, or to other age groups. Finally, this sample  
354 did not capture any participants who reported identifying as transgender and few (n=5) who  
355 identified as gender variant. It is important to acknowledge, therefore, that these findings may  
356 not apply to non-cisgender populations.

## IMPACTS OF PERCEIVED SOCIAL SUPPORT ON ALCOHOL AND CANNABIS USE

### 357 **Conclusions**

358 Changes to substance use patterns during the COVID-19 lockdowns revealed that  
359 different motives may underlie alcohol use compared to cannabis use in emerging adults. Our  
360 findings support the idea that socialization in young adulthood plays an important role in alcohol  
361 use, especially for individuals with higher social support. Importantly, changes to substance use  
362 were not sustained during Eased Restrictions. Several future directions for research are important  
363 to clarify the conclusions of this study. Studies using cross-sectional and prospective cohort  
364 designs would be most useful to answer the following questions with a higher degree of  
365 certainty. First, a direct comparison of alcohol and cannabis use in different living situations  
366 should be investigated. Second, the degree that social motivations dictate alcohol use for  
367 individuals with higher versus lower social support is important to clarify. Third, more research  
368 is needed to investigate whether stress reduction is in fact the primary motivation underlying  
369 cannabis use. Finally, studies on substance use throughout the remainder of the pandemic and  
370 beyond should be conducted to assess whether young adults are truly resilient to the potential  
371 long-term implications of COVID-19 restrictions on substance use.

372

373

374

375

376

377

378

379

## IMPACTS OF PERCEIVED SOCIAL SUPPORT ON ALCOHOL AND CANNABIS USE

### 380 **Acknowledgements**

381 Authors state no acknowledgements.

### 382 **Funding**

383 This work was supported by a Discovery Grant from the Natural Sciences and Engineering

384 Research Council (NSERC) of Canada to M.C.O. (203707).

### 385 **Author Contributions**

386 Michelle J. Blumberg: Conceptualization, Methodology, Formal analysis, Investigation, Data

387 Curation, Writing – Original Draft, Writing – Review & Editing, Project administration.

388 Lindsay A. Lo: Conceptualization, Methodology, Formal analysis, Investigation, Data Curation,

389 Writing – Original Draft, Writing – Review & Editing, Project administration.

390 Geoffrey W. Harrison: Formal analysis, Data Curation, Writing – Review & Editing,

391 Visualization.

392 Alison Dodwell: Methodology, Investigation, Writing – Review & Editing.

393 Samantha H. Irwin: Methodology, Investigation, Writing – Review & Editing.

394 Mary C. Olmstead: Conceptualization, Writing – Review & Editing, Supervision, Funding

395 Acquisition

396

## IMPACTS OF PERCEIVED SOCIAL SUPPORT ON ALCOHOL AND CANNABIS USE

### 397 **References**

- 398 Abbott, A. (2021). COVID's mental-health toll: how scientists are tracking a surge in  
399 depression. *Nature*, 590(7845), 194-195. <https://doi.org/10.1038/d41586-021-00175-z>
- 400 American Psychiatric Association (2013). *Diagnostic and statistical manual of mental disorders*,  
401 *5th ed.* Washington (DC): American Psychiatric Association.
- 402 Arias-De la Torre, J., Fernández-Villa, T., Molina, A. J., Amezcua-Prieto, C., Mateos, R.,  
403 Cancela, J. M., Delgado-Rodríguez, M., ... & Martín, V. (2019). Drug use, family support  
404 and related factors in university students. A cross-sectional study based on the uniHcos  
405 Project data. *Gaceta sanitaria*, 33, 141-147.  
406 <https://doi.org/10.1016/j.gaceta.2017.10.019>
- 407 Asher, S. R., & Weeks, M. S. (2013). Loneliness and belongingness in the college years. *The*  
408 *handbook of solitude: Psychological perspectives on social isolation, social withdrawal,*  
409 *and being alone*, 283-301. <https://doi.org/10.1002/9781118427378.ch16>
- 410 Astudillo, M., Connor, J., Roiblat, R. E., Ibanga, A. K., & Gmel, G. (2013). Influence from  
411 friends to drink more or drink less: A cross-national comparison. *Addictive*  
412 *Behaviors*, 38(11), 2675-2682.  
413 <https://doi.org/10.1016/j.addbeh.2013.06.005>
- 414 Barbosa, C., Cowell, A. J., & Dowd, W. N. (2021). Alcohol consumption in response to the  
415 COVID-19 pandemic in the United States. *Journal of Addiction Medicine*, 15(4), 341.  
416 <http://doi.org/10.1097/ADM.0000000000000767>
- 417 Bartel, S. J., Sherry, S. B., & Stewart, S. H. (2020). Self-isolation: A significant contributor to  
418 cannabis use during the COVID-19 pandemic. *Substance Abuse*, 41(4), 409-412.  
419 <https://doi.org/10.1080/08897077.2020.1823550>.

## IMPACTS OF PERCEIVED SOCIAL SUPPORT ON ALCOHOL AND CANNABIS USE

- 420 Barrera M. (1986) Distinctions between social support concepts, measures, and models.  
421 *American Journal of Community Psychology* 14(4), 413–445.  
422 <https://doi.org/10.1007/BF00922627>
- 423 Berkman L.F. (1984) Assessing the physical health effects of social networks and social support.  
424 In Annual Review of public health (Breslow L., Fielding J. & Lave L. eds.). Annual  
425 Reviews Incorporated, Palo Alto, CA, pp. 413–422.  
426 <https://doi.org/10.1146/annurev.pu.05.050184.002213>
- 427 Beitchman, J. H., Adlaf, E. M., Atkinson, L., Douglas, L., Beitchman, J. H., Adlaf, E. M., ... &  
428 Kenaszchuk, C. (2005). Psychiatric and substance use disorders in late adolescence: the  
429 role of risk and perceived social support. *American Journal on Addictions*, 14(2), 124-  
430 138. <https://doi.org/10.1080/10550490590924755>
- 431 Bollen, Z., Pabst, A., Creupelandt, C., Fontesse, S., Lannoy, S., Pinon, N., & Muraige, P. (2021).  
432 Prior drinking motives predict alcohol consumption during the COVID-19 lockdown: A  
433 cross-sectional online survey among Belgian college students. *Addictive Behaviors*, 115,  
434 106772. <https://doi.org/10.1016/j.addbeh.2020.106772>.
- 435 Bonar, E. E., Chapman, L., McAfee, J., Goldstick, J. E., Bauermeister, J. A., Carter, P. M., ... &  
436 Walton, M. A. (2021). Perceived impacts of the COVID-19 pandemic on cannabis-using  
437 emerging adults. *Translational Behavioral Medicine*, 11(7).  
438 <https://doi.org/10.1093/tbm/ibab025>
- 439 Bottorff, J. L., Johnson, J. L., Moffat, B. M., & Mulvogue, T. (2009). Relief-oriented use of  
440 marijuana by teens. *Substance Abuse Treatment, Prevention, and Policy*, 4(1), 1-10.  
441 <https://doi.org/10.1186/1747-597X-4-7>



## IMPACTS OF PERCEIVED SOCIAL SUPPORT ON ALCOHOL AND CANNABIS USE

- 442 Brennan, P. L. , & Moos, R. H. (1990). Life stressors, social resources, and late-life problem  
443 drinking. *Psychology and Aging*, 5, 491–501. <https://doi.org/10.1037//0882-7974.5.4.491>
- 444 Brewer, S., Godley, M. D., & Hulvershorn, L. A. (2017). Treating mental health and substance  
445 use disorders in adolescents: What is on the menu?. *Current psychiatry reports*, 19(1), 5.  
446 <https://doi.org/10.1007/s11920-017-0755-0>
- 447 Clair, R., Gordon, M., Kroon, M., & Reilly, C. (2021). The effects of social isolation on well-  
448 being and life satisfaction during pandemic. *Humanities and Social Sciences*  
449 *Communications*, 8(1), 1-6. <https://doi.org/10.1057/s41599-021-00710-3>
- 450 Czeisler, M. É., Lane, R. I., Petrosky, E., Wiley, J. F., Christensen, A., Njai, R., ... & Rajaratnam,  
451 S. M. (2020). Mental health, substance use, and suicidal ideation during the COVID-19  
452 pandemic—United States, June 24–30, 2020. *Morbidity and Mortality Weekly*  
453 *Report*, 69(32), 1049. <https://doi.org/10.15585/mmwr.mm6932a1>
- 454 Dissing, A. S., Jørgensen, T. B., Gerds, T. A., Rod, N. H., & Lund, R. (2019). High perceived  
455 stress and social interaction behaviour among young adults. A study based on objective  
456 measures of face-to-face and smartphone interactions. *PloS one*, 14(7), e0218429.  
457 <https://doi.org/10.1371/journal.pone.0218429>.
- 458 Dumas, T. M., Ellis, W., & Litt, D. M. (2020). What does adolescent substance use look like  
459 during the COVID-19 pandemic? Examining changes in frequency, social contexts, and  
460 pandemic-related predictors. *Journal of Adolescent Health*, 67(3), 354-361.  
461 <https://doi.org/10.1016/j.jadohealth.2020.06.018>
- 462 Emmons, K. , Barbewau, E. , Gutheil, C. , Stryker, J. , & Stoddard, A. (2007). Social influences,  
463 social context, and health behaviors among working-class, multiethnic adults. *Health*  
464 *Education and Behavior*, 34, 315–334. <https://doi.org/10.1177/1090198106288011>

## IMPACTS OF PERCEIVED SOCIAL SUPPORT ON ALCOHOL AND CANNABIS USE

- 465 Erikson, E. H. (1965). *Childhood and Society*. United Kingdom: Penguin.
- 466 Galea, S., Merchant, R. M., & Lurie, N. (2020). The mental health consequences of COVID-19  
467 and physical distancing: the need for prevention and early intervention. *JAMA internal*  
468 *medicine*, 180(6), 817-818. <https://doi.org/10.1001/jamainternmed.2020.1562>
- 469 Gette, J. A., Gissandaner, T. D., & Littlefield, A. K. (2021). Alcohol and cannabis cross motives,  
470 class analysis, and substance use among concurrent users. *Substance Use & Misuse*,  
471 56(14), 2085-2095. <https://doi.org/10.1080/10826084.2021.1967991>
- 472 Glodosky, N. C., & Cuttler, C. (2020). Motives Matter: Cannabis use motives moderate the  
473 associations between stress and negative affect. *Addictive behaviors*, 102, 106188.  
474 <https://doi.org/10.1016/j.addbeh.2019.106188>
- 475 Gottlieb B.H. (1983). *Social support strategies: Guidelines for mental health practice*. Sage,  
476 Beverly Hills, CA.
- 477 Grant, V. V., Stewart, S. H., O'Connor, R. M., Blackwell, E., & Conrod, P. J. (2007).  
478 Psychometric evaluation of the five-factor Modified Drinking Motives Questionnaire—  
479 Revised in undergraduates. *Addictive behaviors*, 32(11), 2611-2632.  
480 <https://doi.org/10.1016/j.addbeh.2007.07.004>
- 481 Graupensperger, S., Fleming, C. B., Jaffe, A. E., Rhew, I. C., Patrick, M. E., & Lee, C. M.  
482 (2021). Changes in young adults' alcohol and marijuana use, norms, and motives from  
483 before to during the COVID-19 pandemic. *Journal of Adolescent Health*, 68(4), 658-665.  
484 <https://doi.org/10.1016/j.jadohealth.2021.01.008>.
- 485 Gray, K. M., & Squeglia, L. M. (2018). Research Review: What have we learned about  
486 adolescent substance use?. *Journal of Child Psychology and Psychiatry*, 59(6), 618-627.  
487 <https://doi.org/10.1111/jcpp.12783>.

## IMPACTS OF PERCEIVED SOCIAL SUPPORT ON ALCOHOL AND CANNABIS USE

- 488 Grossman, E. R., Benjamin-Neelon, S. E., & Sonnenschein, S. (2020). Alcohol consumption  
489 during the covid-19 pandemic: a cross-sectional survey of us adults. *International journal*  
490 *of environmental research and public health*, 17(24), 9189.  
491 <https://doi.org/10.3390/ijerph17249189>.
- 492 Grucza, R. A., Norberg, K. E., & Bierut, L. J. (2009). Binge drinking among youths and young  
493 adults in the United States: 1979-2006. *Journal of the American Academy of Child and*  
494 *Adolescent Psychiatry*, 48(7), 692–702. <https://doi.org/10.1097/CHI.0b013e3181a2b32f>
- 495 Hamidullah, S., Thorpe, H. H., Frie, J. A., Mccurdy, R. D., & Khokhar, J. Y. (2020). Adolescent  
496 substance use and the brain: Behavioral, cognitive and neuroimaging correlates. *Frontiers*  
497 *in Human Neuroscience*, 14, 298. <https://doi.org/10.3389/fnhum.2020.00298>.
- 498 Horigian, V. E., Schmidt, R. D., & Feaster, D. J. (2021). Loneliness, mental health, and  
499 substance use among US young adults during COVID-19. *Journal of psychoactive*  
500 *drugs*, 53(1), 1-9. <https://doi.org/10.1080/02791072.2020.1836435>.
- 501 Hyman, S. M., & Sinha, R. (2009). Stress-related factors in cannabis use and misuse:  
502 implications for prevention and treatment. *Journal of substance abuse treatment*, 36(4),  
503 400-413. <https://doi.org/10.1016/j.jsat.2008.08.005>.
- 504 Jacob, L., Smith, L., Armstrong, N. C., Yakkundi, A., Barnett, Y., Butler, L., ... & Tully, M. A.  
505 (2021). Alcohol use and mental health during COVID-19 lockdown: A cross-sectional  
506 study in a sample of UK adults. *Drug and alcohol dependence*, 219, 108488.  
507 <https://doi.org/10.1016/j.drugalcdep.2020.108488>
- 508 Jamison, J., & Myers, L. B. (2008). Peer-group and price influence students drinking along with  
509 planned behaviour. *Alcohol & Alcoholism*, 43(4), 492-497.  
510 <https://doi.org/10.1093/alcalc/agn033>.

## IMPACTS OF PERCEIVED SOCIAL SUPPORT ON ALCOHOL AND CANNABIS USE

- 511 Langford, C. P., Bowsher, J., Maloney, J. P., & Lillis, P. P. (1997). Social support: a conceptual  
512 analysis. *Journal of advanced nursing*, 25(1), 95–100. [https://doi.org/10.1046-](https://doi.org/10.1046/j.1365-2648.1997.1997025095.x)  
513 [2648.1997.1997025095.x](https://doi.org/10.1046/j.1365-2648.1997.1997025095.x)
- 514 Lechner, W. V., Laurene, K. R., Patel, S., Anderson, M., Grega, C., & Kenne, D. R. (2020).  
515 Changes in alcohol use as a function of psychological distress and social support  
516 following COVID-19 related University closings. *Addictive Behaviors*, 110, 106527.  
517 <https://doi.org/10.1016/j.addbeh.2020.106527>
- 518 Levy, S., Sherritt, L., Harris, S. K., Gates, E. C., Holder, D. W., Kulig, J. W., & Knight, J. R.  
519 (2004). Test-retest reliability of adolescents' self-report of substance use. *Alcoholism:*  
520 *Clinical and Experimental Research*, 28(8), 1236-1241.  
521 <https://doi.org/10.1097/01.ALC.0000134216.22162.A5>
- 522 Li, F., Luo, S., Mu, W., Li, Y., Ye, L., Zheng, X., ... & Chen, X. (2021). Effects of sources of  
523 social support and resilience on the mental health of different age groups during the  
524 COVID-19 pandemic. *BMC psychiatry*, 21(1), 1-14. [https://doi.org/10.1186/s12888-020-](https://doi.org/10.1186/s12888-020-03012-1)  
525 [03012-1](https://doi.org/10.1186/s12888-020-03012-1).
- 526 Martin-Willett, R., Helmuth, T., Abraha, M., Bryan, A. D., Hitchcock, L., Lee, K., & Bidwell, L.  
527 C. (2020). Validation of a multisubstance online Timeline Followback assessment. *Brain*  
528 *and behavior*, 10(1), e01486. <https://doi.org/10.1002/brb3.1486>
- 529 O'Hara, R. E., Armeli, S., & Tennen, H. (2016). Alcohol and cannabis use among college  
530 students: Substitutes or complements?. *Addictive behaviors*, 58, 1-6.  
531 <https://doi.org/10.1016/j.addbeh.2016.02.004>
- 532 Ornell, F., Moura, H. F., Scherer, J. N., Pechansky, F., Kessler, F. H. P., & von Diemen, L.  
533 (2020). The COVID-19 pandemic and its impact on substance use: implications for

## IMPACTS OF PERCEIVED SOCIAL SUPPORT ON ALCOHOL AND CANNABIS USE

- 534 prevention and treatment. *Psychiatry research*, 289, 113096.
- 535 <https://doi.org/10.1016/j.psychres.2020.113096>
- 536 Ozbay, F., Johnson, D. C., Dimoulas, E., Morgan III, C. A., Charney, D., & Southwick, S.
- 537 (2007). Social support and resilience to stress: from neurobiology to clinical
- 538 practice. *Psychiatry (Edgmont)*, 4(5), 35.
- 539 Papp, L. M., & Kouros, C. D. (2021). Effect of COVID-19 disruptions on young adults' affect
- 540 and substance use in daily life. *Psychology of Addictive Behaviors*, 35(4), 391–401.
- 541 <https://doi.org/10.1037/adb0000748>
- 542 Peacock, A., Leung, J., Larney, S., Colledge, S., Hickman, M., Rehm, J., ... & Degenhardt, L.
- 543 (2018). Global statistics on alcohol, tobacco and illicit drug use: 2017 status
- 544 report. *Addiction*, 113(10), 1905-1926. <https://doi.org/10.1111/add.14234>.
- 545 Piko, B. (2000). Perceived social support from parents and peers: which is the stronger predictor
- 546 of adolescent substance use? *Substance use & misuse*, 35(4), 617-630.
- 547 <https://doi.org/10.3109/10826080009147475>
- 548 Qualtrics XM. (2020). *Experience management software*. Qualtrics. <https://www.qualtrics.com/>
- 549 Rapier, R., McKernan, S., & Stauffer, C. S. (2019). An inverse relationship between perceived
- 550 social support and substance use frequency in socially stigmatized populations. *Addictive*
- 551 *Behaviors Reports*, 10, 100188. <https://doi.org/10.1016/j.abrep.2019.100188>
- 552 Richards, J. S., Hartman, C. A., Jeronimus, B. F., Ormel, J., Reijneveld, S. A., Veenstra, R., ... &
- 553 Oldehinkel, A. J. (2019). Beyond not bad or just okay: social predictors of young adults'
- 554 wellbeing and functioning (a TRAILS study). *Psychological medicine*, 49(9), 1459-1469.
- 555 <https://doi.org/10.1017/S0033291718001976>

## IMPACTS OF PERCEIVED SOCIAL SUPPORT ON ALCOHOL AND CANNABIS USE

- 556 Romano, P. S. , Bloom, J. , & Syme, S. L. (1991). Smoking, social support, and hassles in an  
557 urban African-American community. *American Journal of Public Health, 81*, 1415–  
558 1422. <https://doi.org/10.2105/ajph.81.11.1415>
- 559 Romm, K. F., Patterson, B., Arem, H., Price, O. A., Wang, Y., & Berg, C. J. (2021). Cross-  
560 sectional retrospective assessments versus longitudinal prospective assessments of  
561 substance use change among young adults during COVID-19: Magnitude and correlates  
562 of discordant findings. *Substance Use and Misuse, 10*:1-6.  
563 <https://doi.org/10.1080/10826084.2021.2012696>
- 564 Sandstrom, G. M., & Dunn, E. W. (2014). Social interactions and well-being: The surprising  
565 power of weak ties. *Personality and Social Psychology Bulletin, 40*(7), 910-922.  
566 <https://doi.org/10.1177/0146167214529799>
- 567 Scardera, S., Perret, L. C., Ouellet-Morin, I., Gariépy, G., Juster, R. P., Boivin, M., ... &  
568 Geoffroy, M. C. (2020). Association of social support during adolescence with  
569 depression, anxiety, and suicidal ideation in young adults. *JAMA network open, 3*(12),  
570 e2027491-e2027491. <https://doi.org/10.1001/jamanetworkopen.2020.27491>
- 571 Schwartz, S.J., Petrova, M. Prevention Science in Emerging Adulthood: a Field Coming of Age.  
572 *Prev Sci 20*, 305–309 (2019). <https://doi.org/10.1007/s11121-019-0975-0>
- 573 Segrin, C., McNelis, M., & Swiatkowski, P. (2016). Social support indirectly predicts problem  
574 drinking through reduced psychological distress. *Substance use & misuse, 51*(5), 608-  
575 615. <https://doi.org/10.3109/10826084.2015.1126746>
- 576 Sharma, P., Ebbert, J. O., Rosedahl, J. K., & Philpot, L. M. (2020). Changes in substance use  
577 among young adults during a respiratory disease pandemic. *SAGE open medicine, 8*.  
578 <https://doi.org/10.1177/2050312120965321>.

## IMPACTS OF PERCEIVED SOCIAL SUPPORT ON ALCOHOL AND CANNABIS USE

- 579 Shumaker S.A. & Bronwell A. (1984). Toward a theory of social support: Closing conceptual  
580 gaps. *Journal of Social Issues* 42(6), 589–593. 40(4), 11–33.  
581 <https://doi.org/10.1111/j.1540-4560.1984.tb01105.x>
- 582 Singh, S., Roy, M. D., Sinha, C. P. T. M. K., Parveen, C. P. T. M. S., Sharma, C. P. T. G., &  
583 Joshi, C. P. T. G. (2020). Impact of COVID-19 and lockdown on mental health of  
584 children and adolescents: A narrative review with recommendations. *Psychiatry*  
585 *research*, 113429. <https://doi.org/10.1016/j.psychres.2020.113429>.
- 586 Sobell, L. C., Agrawal, S., Annis, H., Ayala-Velazquez, H., Echeverria, L., Leo, G. I., ... &  
587 Ziolkowski, M. (2001). Cross-cultural evaluation of two drinking assessment  
588 instruments: alcohol timeline followback and inventory of drinking situations. *Substance*  
589 *use & misuse*, 36(3), 313-331. <https://doi.org/10.1081/JA-100102628>
- 590 Stone, A. L., Becker, L. G., Huber, A. M., & Catalano, R. F. (2012). Review of risk and  
591 protective factors of substance use and problem use in emerging adulthood. *Addictive*  
592 *behaviors*, 37(7), 747-775. <https://doi.org/10.1016/j.addbeh.2012.02.014>.
- 593 Sylvestre, M.-P., Dinkou, G. D., Naja, M., Riglea, T., Pelekanakis, A., Bélanger, M., Maximova,  
594 K., Mowat, D., Paradis, G., & O'Loughlin, J. (2022). A longitudinal study of change  
595 in substance use from before to during the covid-19 pandemic in Young Adults. *The*  
596 *Lancet Regional Health - Americas*, 8, 100168.  
597 <https://doi.org/10.1016/j.lana.2021.100168>
- 598 Taylor, S., Paluszek, M. M., Rachor, G., McKay, D. & Asmundson, G. J. G. (2021). Substance  
599 use and abuse, COVID-19-related distress, and disregard for social distancing: A network  
600 analysis. *Addictive Behaviours*, 114:106754.  
601 <https://doi.org/10.1016/j.addbeh.2020.106754>

## IMPACTS OF PERCEIVED SOCIAL SUPPORT ON ALCOHOL AND CANNABIS USE

- 602 Van Damme, J., Maes, L., Clays, E., Rosiers, J. F., Van Hal, G., & Hublet, A. (2013). Social  
603 motives for drinking in students should not be neglected in efforts to decrease  
604 problematic drinking. *Health education research*, 28(4), 640-650.  
605 <https://doi.org/10.1093/her/cyt036>
- 606 Vanderbruggen, N., Matthys, F., Van Laere, S., Zeeuws, D., Santermans, L., Van den Aemele,  
607 S., & Crunelle, C. L. (2020). Self-reported alcohol, tobacco, and cannabis use during  
608 COVID-19 lockdown measures: results from a web-based survey. *European addiction*  
609 *research*, 26(6), 309-315. <https://doi.org/10.1159/000510822>
- 610 Vaughan, E. L., Corbin, W. R., & Fromme, K. (2009). Academic and social motives and  
611 drinking behavior. *Psychology of addictive behaviors*, 23(4), 564.  
612 <https://doi.org/10.1037/a0017331>
- 613 Vincenzi, T., Mario, D. N., Cericato, G. O., Portilio, M. N., & Rigo, L. (2017). Emergence of  
614 cannabis as the second most commonly used psychoactive substance among  
615 students. *Journal of Human Growth and Development*, 27(2), 244-252.  
616 <https://doi.org/10.7322/jhgd.125827>
- 617 Wardell, J. D., Kempe, T., Rapinda, K. K., Single, A., Bilevicius, E., Frohlich, J. R., ... &  
618 Keough, M. T. (2020). Drinking to cope during COVID-19 pandemic: the role of  
619 external and internal factors in coping motive pathways to alcohol use, solitary drinking,  
620 and alcohol problems. *Alcoholism: Clinical and Experimental Research*, 44(10),  
621 2073-2083. <https://doi.org/10.1111/acer.14425>.
- 622 White, H. R., Stevens, A. K., Hayes, K., & Jackson, K. M. (2020). Changes in alcohol  
623 consumption among college students due to COVID-19: effects of campus closure and  
624 residential change. *Journal of studies on alcohol and drugs*, 81(6), 725-730.



## IMPACTS OF PERCEIVED SOCIAL SUPPORT ON ALCOHOL AND CANNABIS USE

- 625 <https://doi.org/10.15288/jsad.2020.81.725>
- 626 Wills, T. A., & Ainette, M. C. (2012). Social networks and social support. In A. Baum, T. A.  
627 Revenson, & J. Singer (Eds.), *Handbook of health psychology* (pp. 465–492).  
628 Psychology Press.
- 629 Wills, T. , Resko, J. , Ainette, M. , & Mendoza, D. (2004). Parent and peer support in adolescent  
630 substance use: Mediated effects. *Psychology of Addictive Behaviors, 18*, 122–134.
- 631 World Health Organization (2020). Coronavirus Disease (COVID-19) Pandemic. Retrieved from  
632 <https://www.who.int/health-topics/coronavirus>
- 633 Wortman C.B. & Dunkel-Schetter C. (1987) Conceptual and methodological issues in the study  
634 of social support. In *Hand book of psychology and health* (Baum A. & Singer J.E. eds).  
635 Lawrence Erlbaum Associates, Hillsdale, NJ, pp. 63–108.
- 636 Zimet, G. D., Dahlem, N. W., Zimet, S. G., & Farley, G. K. (1988). The multidimensional scale  
637 of perceived social support. *Journal of personality assessment, 52*(1), 30-41.  
638 [https://doi.org/10.1207/s15327752jpa5201\\_2](https://doi.org/10.1207/s15327752jpa5201_2).
- 639
- 640
- 641

## IMPACTS OF PERCEIVED SOCIAL SUPPORT ON ALCOHOL AND CANNABIS USE

642 Appendix

643 Table 1: Questionnaire

644 Substance use during the COVID-19 pandemic: A Self-Report Questionnaire

645

646 The following questions pertain to three time points of the COVID-19 pandemic. The **Pre**  
 647 **COVID-19** timeframe refers to the timeframe between January 1st 2020 and March 1st 2020,  
 648 before government mandated stay-at-home and physical distancing orders. The **Start of**  
 649 **COVID-19** timeframe refers to the timeframe between mid-March (approximately March 15th,  
 650 2020) and May 31st 2020, at the peak of government mandated stay-at-home and physical  
 651 distancing orders. The **Late-stage COVID-19** timeframe refers to the timeframe from June 1<sup>st</sup>  
 652 2020 to July 31<sup>st</sup> 2020, when COVID-19 restrictions began to ease and regions were moved into  
 653 stage 2 and 3 of re-opening. This includes increasing social circles up to 50 people and the  
 654 opening of businesses, restaurants, bars, and recreational facilities. Depending on your region  
 655 these dates may be altered slightly, however, we ask that you answer the following questions  
 656 with reference to the state of government mandated stay-at-home and physical distancing orders,  
 657 as listed above in Pre COVID-19, start of COVID-19, and Late-stage COVID-19 timeframes.  
 658  
 659

| <b>Perceived Social Support</b>                                                                                                                                                                      |                   |                                                                                        |
|------------------------------------------------------------------------------------------------------------------------------------------------------------------------------------------------------|-------------------|----------------------------------------------------------------------------------------|
| <b>Pre COVID-19 (January 1st 2020 - March 1st 2020):</b> The following questions pertain to how much social support you felt before government mandated stay-at-home and physical distancing orders. |                   |                                                                                        |
| I have a special person who is around when I am in need                                                                                                                                              | Likert scale - MC | 1 – Very strongly disagree<br>2<br>3<br>4- Neutral<br>5<br>6<br>7- Very strongly agree |
| There is a special person with whom I can share joys and sorrows.                                                                                                                                    | Likert scale - MC | 1 – Very strongly disagree<br>2<br>3<br>4- Neutral<br>5<br>6<br>7- Very strongly agree |

IMPACTS OF PERCEIVED SOCIAL SUPPORT ON ALCOHOL AND CANNABIS USE

|                                                                |                   |                                                                                        |
|----------------------------------------------------------------|-------------------|----------------------------------------------------------------------------------------|
| My family really tries to help me.                             | Likert scale - MC | 1 – Very strongly disagree<br>2<br>3<br>4- Neutral<br>5<br>6<br>7- Very strongly agree |
| I get the emotional help & support I need from my family.      | Likert scale - MC | 1 – Very strongly disagree<br>2<br>3<br>4- Neutral<br>5<br>6<br>7- Very strongly agree |
| I have a special person who is a real source of comfort to me. | Likert scale - MC | 1 – Very strongly disagree<br>2<br>3<br>4- Neutral<br>5<br>6<br>7- Very strongly agree |
| My friends really try to help me                               | Likert scale - MC | 1 – Very strongly disagree<br>2<br>3<br>4- Neutral<br>5<br>6<br>7- Very strongly agree |
| I can count on my friends when things go wrong.                | Likert scale - MC | 1 – Very strongly disagree<br>2<br>3<br>4- Neutral<br>5<br>6<br>7- Very strongly agree |
| I can talk about my problems with my family                    | Likert scale - MC | 1 – Very strongly disagree<br>2<br>3<br>4- Neutral<br>5<br>6<br>7- Very strongly agree |

IMPACTS OF PERCEIVED SOCIAL SUPPORT ON ALCOHOL AND CANNABIS USE

|                                                                                                                                                                                                                   |                   |                                                                                        |
|-------------------------------------------------------------------------------------------------------------------------------------------------------------------------------------------------------------------|-------------------|----------------------------------------------------------------------------------------|
| I have friends with whom I can share my joys and sorrows                                                                                                                                                          | Likert scale - MC | 1 – Very strongly disagree<br>2<br>3<br>4- Neutral<br>5<br>6<br>7- Very strongly agree |
| There is a special person in my life who cares about my feelings                                                                                                                                                  | Likert scale - MC | 1 – Very strongly disagree<br>2<br>3<br>4- Neutral<br>5<br>6<br>7- Very strongly agree |
| My family is willing to help me make decisions                                                                                                                                                                    | Likert scale - MC | 1 – Very strongly disagree<br>2<br>3<br>4- Neutral<br>5<br>6<br>7- Very strongly agree |
| I can talk about my problems with my friends.                                                                                                                                                                     | Likert scale - MC | 1 – Very strongly disagree<br>2<br>3<br>4- Neutral<br>5<br>6<br>7- Very strongly agree |
| <b>Start of COVID-19 (Mid March 2020 to end of May 2020):</b> The following questions pertain to how much social support you felt at the peak of government mandated stay-at-home and physical distancing orders. |                   |                                                                                        |
| I have a special person who is around when I am in need                                                                                                                                                           | Likert scale - MC | 1 – Very strongly disagree<br>2<br>3<br>4- Neutral<br>5<br>6<br>7- Very strongly agree |

IMPACTS OF PERCEIVED SOCIAL SUPPORT ON ALCOHOL AND CANNABIS USE

|                                                                          |                          |                                                                                                     |
|--------------------------------------------------------------------------|--------------------------|-----------------------------------------------------------------------------------------------------|
| <p>There is a special person with whom I can share joys and sorrows.</p> | <p>Likert scale - MC</p> | <p>1 – Very strongly disagree<br/>2<br/>3<br/>4- Neutral<br/>5<br/>6<br/>7- Very strongly agree</p> |
| <p>My family really tries to help me.</p>                                | <p>Likert scale - MC</p> | <p>1 – Very strongly disagree<br/>2<br/>3<br/>4- Neutral<br/>5<br/>6<br/>7- Very strongly agree</p> |
| <p>I get the emotional help &amp; support I need from my family.</p>     | <p>Likert scale - MC</p> | <p>1 – Very strongly disagree<br/>2<br/>3<br/>4- Neutral<br/>5<br/>6<br/>7- Very strongly agree</p> |
| <p>I have a special person who is a real source of comfort to me.</p>    | <p>Likert scale - MC</p> | <p>1 – Very strongly disagree<br/>2<br/>3<br/>4- Neutral<br/>5<br/>6<br/>7- Very strongly agree</p> |
| <p>My friends really try to help me</p>                                  | <p>Likert scale - MC</p> | <p>1 – Very strongly disagree<br/>2<br/>3<br/>4- Neutral<br/>5<br/>6<br/>7- Very strongly agree</p> |

IMPACTS OF PERCEIVED SOCIAL SUPPORT ON ALCOHOL AND CANNABIS USE

|                                                                  |                   |                                                                                        |
|------------------------------------------------------------------|-------------------|----------------------------------------------------------------------------------------|
| I can count on my friends when things go wrong.                  | Likert scale - MC | 1 – Very strongly disagree<br>2<br>3<br>4- Neutral<br>5<br>6<br>7- Very strongly agree |
| I can talk about my problems with my family                      | Likert scale - MC | 1 – Very strongly disagree<br>2<br>3<br>4- Neutral<br>5<br>6<br>7- Very strongly agree |
| I have friends with whom I can share my joys and sorrows         | Likert scale - MC | 1 – Very strongly disagree<br>2<br>3<br>4- Neutral<br>5<br>6<br>7- Very strongly agree |
| There is a special person in my life who cares about my feelings | Likert scale - MC | 1 – Very strongly disagree<br>2<br>3<br>4- Neutral<br>5<br>6<br>7- Very strongly agree |
| My family is willing to help me make decisions                   | Likert scale - MC | 1 – Very strongly disagree<br>2<br>3<br>4- Neutral<br>5<br>6<br>7- Very strongly agree |

IMPACTS OF PERCEIVED SOCIAL SUPPORT ON ALCOHOL AND CANNABIS USE

|                                                                                                                                                                                                                                                          |                   |                                                                                        |
|----------------------------------------------------------------------------------------------------------------------------------------------------------------------------------------------------------------------------------------------------------|-------------------|----------------------------------------------------------------------------------------|
| I can talk about my problems with my friends.                                                                                                                                                                                                            | Likert scale - MC | 1 – Very strongly disagree<br>2<br>3<br>4- Neutral<br>5<br>6<br>7- Very strongly agree |
| <b>Late-stage COVID-19 (June 1<sup>st</sup> 2020 – July 31<sup>st</sup> 2020):</b> The following questions pertain to how much social support you felt when COVID-19 restrictions began to ease and regions were moved into stage 2 and 3 of re-opening. |                   |                                                                                        |
| I have a special person who is around when I am in need                                                                                                                                                                                                  | Likert scale - MC | 1 – Very strongly disagree<br>2<br>3<br>4- Neutral<br>5<br>6<br>7- Very strongly agree |
| There is a special person with whom I can share joys and sorrows.                                                                                                                                                                                        | Likert scale - MC | 1 – Very strongly disagree<br>2<br>3<br>4- Neutral<br>5<br>6<br>7- Very strongly agree |
| My family really tries to help me.                                                                                                                                                                                                                       | Likert scale - MC | 1 – Very strongly disagree<br>2<br>3<br>4- Neutral<br>5<br>6<br>7- Very strongly agree |

IMPACTS OF PERCEIVED SOCIAL SUPPORT ON ALCOHOL AND CANNABIS USE

|                                                                |                   |                                                                                        |
|----------------------------------------------------------------|-------------------|----------------------------------------------------------------------------------------|
| I get the emotional help & support I need from my family.      | Likert scale - MC | 1 – Very strongly disagree<br>2<br>3<br>4- Neutral<br>5<br>6<br>7- Very strongly agree |
| I have a special person who is a real source of comfort to me. | Likert scale - MC | 1 – Very strongly disagree<br>2<br>3<br>4- Neutral<br>5<br>6<br>7- Very strongly agree |
| My friends really try to help me                               | Likert scale - MC | 1 – Very strongly disagree<br>2<br>3<br>4- Neutral<br>5<br>6<br>7- Very strongly agree |
| I can count on my friends when things go wrong.                | Likert scale - MC | 1 – Very strongly disagree<br>2<br>3<br>4- Neutral<br>5<br>6<br>7- Very strongly agree |
| I can talk about my problems with my family                    | Likert scale - MC | 1 – Very strongly disagree<br>2<br>3<br>4- Neutral<br>5<br>6<br>7- Very strongly agree |



IMPACTS OF PERCEIVED SOCIAL SUPPORT ON ALCOHOL AND CANNABIS USE

|                                                                  |                   |                                                                                        |
|------------------------------------------------------------------|-------------------|----------------------------------------------------------------------------------------|
| I can talk about my problems with my family                      | Likert scale - MC | 1 – Very strongly disagree<br>2<br>3<br>4- Neutral<br>5<br>6<br>7- Very strongly agree |
| I have friends with whom I can share my joys and sorrows         | Likert scale - MC | 1 – Very strongly disagree<br>2<br>3<br>4- Neutral<br>5<br>6<br>7- Very strongly agree |
| There is a special person in my life who cares about my feelings | Likert scale - MC | 1 – Very strongly disagree<br>2<br>3<br>4- Neutral<br>5<br>6<br>7- Very strongly agree |
| My family is willing to help me make decisions                   | Likert scale - MC | 1 – Very strongly disagree<br>2<br>3<br>4- Neutral<br>5<br>6<br>7- Very strongly agree |
| I can talk about my problems with my friends.                    | Likert scale - MC | 1 – Very strongly disagree<br>2<br>3<br>4- Neutral<br>5<br>6<br>7- Very strongly agree |

660

**Substance use**

## IMPACTS OF PERCEIVED SOCIAL SUPPORT ON ALCOHOL AND CANNABIS USE

|                                                |    |           |
|------------------------------------------------|----|-----------|
| Have you used alcohol and/or cannabis in 2020? | MC | Yes<br>No |
|------------------------------------------------|----|-----------|

661  
662  
663

Copyright: Sobell & Sobell 2008, adapted from University of Washington Online Tool

### Timeline Follow Back Alcohol and Cannabis Use Calendar

#### INSTRUCTIONS for Filling Out the Timeline Alcohol and Cannabis Use Calendar

To help us evaluate your drinking and cannabis use during the COVID-19 pandemic, we need to get an idea of what your alcohol and cannabis use was like in the **past 6 months**. To do this, we would like you to fill out the following questions regarding use during 3 different month-long time points.

These three periods correspond to the same three periods you were asked to recall earlier in the survey. The three months being used for this portion are:

- **February:** The **Pre COVID-19** timeframe month, before government mandated stay-at-home and physical distancing orders.
- **April:** The **Start of COVID-19** timeframe month, at the peak of government mandated stay-at-home and physical distancing orders.
- **July:** The **Late-stage COVID-19** timeframe month, when COVID-19 restrictions began to ease and regions were moved into stage 2 and 3 of re-opening.
  - Try to be as accurate as possible.
  - We recognize you won't have perfect recall. That's OKAY.

#### WHAT TO FILL IN (Alcohol and cannabis Use)

##### DRINKING:

- **DRINKS:** The idea is to select a number in the box labeled DRINKS beneath each calendar.
- We want you to record your drinking using Standard Drinks.
- **Examples:** if you had 6 beers, type the number 6 for that day. If you drank two or more different kinds of alcoholic beverages such as 2 beers and 3 glasses of wine, you would type the number 5.

## IMPACTS OF PERCEIVED SOCIAL SUPPORT ON ALCOHOL AND CANNABIS USE

- Remember DRINKS = “number of times you consumed alcohol during that particular day”

### One standard drink is defined as:

- **12 oz. (341 ml) of beer, cider, or cooler**
  - 12 oz. is a typical can size, drinks may also come in 16oz. (tall boy) or 22 oz. (large bottles, often from breweries) cans/bottles. Consider the container you typically drink from.
- **5 oz. of wine**
  - About one half of a glass is 5 oz. One bottle of wine is about 5 drinks.
- **1 oz. (one shot) of liquor** (e.g., vodka, rum, tequila, gin)
- **1 cocktail with 1 oz. of liquor**
  - A mixed drink with three shots is considered 3 drinks

### CANNABIS:

- Again, the idea is to select a number in the box to record your cannabis use.
- **CANNABIS:** Please only record consumption when you used a **THC-containing cannabis product**. Consider one consumption of CANNABIS to be one occasion where you consumed THC-containing cannabis products such as smoking one joint, bowl, pipe, bong, vaporizer, or consuming an edible/ any other intoxicating route of consumption within one time period.
- **Examples:** if you and two friends split one bowl, that would be one occasion. If you repacked it and smoked again, that would be two occasions. If you smoked once at 2pm and again at 7pm, this would be two consumptions entered for CANNABIS.
- If you used a CBD-only product (0% THC) **do not count this as an occasion of consumption.**
- Remember CANNABIS = "number of times you consumed a THC-containing cannabis product during that particular day."

**It's important that something is selected in the DRINKS and CANNABIS boxes, even if it is a "0". If you did not consume alcohol and/or cannabis please select “0”.**

**YOUR BEST ESTIMATE**

## IMPACTS OF PERCEIVED SOCIAL SUPPORT ON ALCOHOL AND CANNABIS USE

- We realize it isn't easy to recall things with 100% accuracy.
- If you are not sure whether you drank 7 or 11 drinks or whether you drank on a Thursday or a Friday, **give it your best guess!** What is important is that 7 or 11 drinks is very different from 1 or 2 drinks or 25 drinks. The goal is to get a sense of how frequently you drank, how much you drank, and your patterns of drinking.
- The same goes for cannabis use. If you do remember if you smoked on a Friday or a Saturday, just pick one. Just do the best you can to remember your behavior over the three designated months.

### **HELPFUL HINTS**

- If you have an appointment book or calendar you can use it to help you recall your drinking and cannabis use.
- Checking bank statements for days you purchased alcohol or cannabis may also be a useful tool for recall.
- On the next page, if you wish, you can indicate certain holidays, personal events, special occasions, etc. that will help you recall your use within the three designated months.

### **COMPLETING THE CALENDAR QUESTIONS**

First view the sample calendar so you have a sense of what the assessment should look like.

On the next page you have the option to fill in marker days.

### **NEXT PAGE**

#### **MARKER Days**

It may be helpful to take a moment to recall certain holidays, birthdays, newsworthy events and other personal events that are meaningful to you. These (whether involving alcohol and cannabis use or not) can assist in recall of your behavior over the three designated months. Please consider national holidays (such as Family Day [February 15th (for Ontario)], Good Friday [April 2nd], Canada Day [July 1st]), important school dates like the day classes ended or the day you finished exams, major news events, your own or others' birthdays, vacation beginning and end dates, or other dates of important personal events (such as changing jobs, buying a house, starting a new romantic relationship, a breakup).

## IMPACTS OF PERCEIVED SOCIAL SUPPORT ON ALCOHOL AND CANNABIS USE

Please enter up to 10 personal marker days. An example is provided:

|         | Date | Event       |
|---------|------|-------------|
| Example | 7/31 | My birthday |
| 1.      |      |             |
| 2.      |      |             |
| 3.      |      |             |
| 4.      |      |             |
| 5.      |      |             |
| 6.      |      |             |
| 7.      |      |             |
| 8.      |      |             |
| 9.      |      |             |
| 10.     |      |             |

### NEXT PAGE

Remember, DRINKS = standard drinks. CANNABIS = number of occasions you used cannabis.

Standard drinks:

- **12 oz. (341 ml) of beer, cider, or cooler**
  - 12 oz. is a typical can size, drinks may also come in 16oz. (tall boy) or 22 oz. (large bottles, often from breweries) cans/bottles. Consider the container you typically drink from.
  
- **5 oz. of wine**

## IMPACTS OF PERCEIVED SOCIAL SUPPORT ON ALCOHOL AND CANNABIS USE

- About one half of a glass is 5 oz. One bottle of wine is about 5 drinks.

- **1 oz. (one shot) of liquor** (e.g., vodka, rum, tequila, gin)
- **1 cocktail with 1 oz. of liquor**
  - A mixed drink with three shots is considered 3 drinks

One consumption of CANNABIS:

- one occasion where you consumed THC-containing cannabis products such as smoking one joint, bowl, pipe, bong, vaporizer, or consuming an edible/ any other intoxicating route of consumption within one time period.

Please make sure to select options for both DRINKS and CANNABIS for February (Pre-COVID-19).

### NEXT PAGE

Remember, DRINKS = standard drinks. CANNABIS = number of occasions you used cannabis.

Standard drinks:

- **12 oz. (341 ml) of beer, cider, or cooler**
  - 12 oz. is a typical can size, drinks may also come in 16oz. (tall boy) or 22 oz. (large bottles, often from breweries) cans/bottles. Consider the container you typically drink from.
- **5 oz. of wine**
  - About one half of a glass is 5 oz. One bottle of wine is about 5 drinks.
- **1 oz. (one shot) of liquor** (e.g., vodka, rum, tequila, gin)
- **1 cocktail with 1 oz. of liquor**
  - A mixed drink with three shots is considered 3 drinks

One consumption of CANNABIS:

- one occasion where you consumed THC-containing cannabis products such as smoking one joint, bowl, pipe, bong, vaporizer, or consuming an edible/ any other intoxicating route of consumption within one time period.

## IMPACTS OF PERCEIVED SOCIAL SUPPORT ON ALCOHOL AND CANNABIS USE

Please make sure to select options for both DRINKS and CANNABIS for April (Start of COVID-19).

### NEXT PAGE

Remember, DRINKS = standard drinks. HOURS = hours spent drinking alcohol. JOINTS = number of occasions you used cannabis:

- **12 oz. of beer** (8 oz. Canadian beer, malt liquor, or ice beers or 10 oz. of microbrew)
- Beers may come in 12 oz., 16oz. or 22 oz. cans. Consider the container you typically drink from.
- 40 oz. of malt liquor is 5 drinks. 40 oz. of regular beer is about 3 drinks.
  
- 10 oz. of wine cooler (e.g., Mike's Hard Lemonade, Smirnoff Ice)
- **4 oz. of wine**
- About one half of a glass is 4 oz. One bottle of wine is about 5 drinks.
  
- 1 oz. (one shot) of 100 proof liquor
- 1 1/4 oz. (one shot) of 80 proof liquor
- **1 cocktail with 1 oz. of 100 proof or 1 1/4 oz. of 80 proof liquor**
- A mixed drink with three shots is considered 3 drinks

Please make sure to select options for both DRINKS and CANNABIS for July (Late-stage COVID-19).

### SURVEY COMPLETE

664  
665  
666

| Demographics |                   |                                |
|--------------|-------------------|--------------------------------|
| Question     | Question type     | Answer options (if applicable) |
| Age          | Fillable box (FB) |                                |

IMPACTS OF PERCEIVED SOCIAL SUPPORT ON ALCOHOL AND CANNABIS USE

|                                                            |                             |                                                                                                                                                                                               |
|------------------------------------------------------------|-----------------------------|-----------------------------------------------------------------------------------------------------------------------------------------------------------------------------------------------|
| Gender                                                     | Multiple choice (MC) and FB | Male<br>Female<br>Transgender female<br>Transgender male<br>Gender-variant / non-conforming<br>Prefer not to say<br>Other                                                                     |
| Area of residence: please include city and province        | FB                          |                                                                                                                                                                                               |
| Please specify your relationship status:                   | MC and FB                   | Single<br>In a relationship<br>Common law<br>Married<br>Separated or divorced<br>Other<br>If you would like to provide more context as to your relationship status please specify here: _____ |
| Current living situation                                   | MC                          | Live alone<br>Live with roommate(s)<br>Live with partner<br>Live with family<br>Other: _____                                                                                                  |
| Employment status Pre-COVID-19                             | MC                          | Student<br>Working<br>unemployed                                                                                                                                                              |
| Employment status during COVID-19                          | MC                          | Student<br>Working<br>unemployed                                                                                                                                                              |
| If your employment status changed, was it due to COVID-19? | Yes/No                      | Yes<br>No                                                                                                                                                                                     |



IMPACTS OF PERCEIVED SOCIAL SUPPORT ON ALCOHOL AND CANNABIS USE

|                                                                  |                     |                                                                                                                                                                                                                                                                                                                                                                                                        |
|------------------------------------------------------------------|---------------------|--------------------------------------------------------------------------------------------------------------------------------------------------------------------------------------------------------------------------------------------------------------------------------------------------------------------------------------------------------------------------------------------------------|
| Current level of education                                       | MC                  | No degree<br>High school<br>Undergraduate or college<br>Post- graduate (ex: masters)<br>Professional (ex: medicine, law, dentistry)                                                                                                                                                                                                                                                                    |
| Since the COVID-19 pandemic, I have been: (check all that apply) | MC- multi selection | More stressed about my own and/or families health<br><br>More stressed about the uncertainty of the future<br><br>More stressed about personal relationships<br><br>Experiencing an overall increase in stress or anxiety<br><br>Experiencing an overall decrease in mental health<br><br>More stressed about my or my family’s economic situation<br><br>Unbothered by the current COVID-19 situation |

667  
668  
669

| <b>Exit questions</b>                                                  |                      |                                                                           |
|------------------------------------------------------------------------|----------------------|---------------------------------------------------------------------------|
| <b>Question</b>                                                        | <b>Question type</b> | <b>Answer options (if applicable)</b>                                     |
| <b>Would you like to be entered in a draw to win a \$25 gift card?</b> | <b>MC/Fillable</b>   | <b>Yes</b><br><b>No</b><br><b>If yes please provide your email: _____</b> |

IMPACTS OF PERCEIVED SOCIAL SUPPORT ON ALCOHOL AND CANNABIS USE

|                                                        |                    |                                                                           |
|--------------------------------------------------------|--------------------|---------------------------------------------------------------------------|
| <b>Can we contact you again for follow up surveys?</b> | <b>MC/Fillable</b> | <b>Yes</b><br><b>No</b><br><b>If yes please provide your email: _____</b> |
|--------------------------------------------------------|--------------------|---------------------------------------------------------------------------|

670  
671
